# Supplementary material
Source: PubMed Central journal article supplement (PMC8216605)
Supplement: CJN.18501120SupplementaryData.pdf [file CJN.18501120SupplementaryData.pdf]

## Supplemental Material

Supplemental Table 1. Percentage of data completion of the baseline characteristics in studied patients

Supplemental Table 2. Baseline characteristics of 1,982,488 subjects aged 18 years or above with baseline eGFR  $\geq 60$ ml/min/1.73m<sup>2</sup> in different drug groups before weighting

Supplemental Table 3. Follow-up period by NSAID treatment groups

Supplemental Figure 1. Associations of NSAID use with incident eGFR < 60mL/min/1.73m<sup>2</sup> and eGFR decline  $\geq 30\%$  with NSAID usage defined by at least 7 consecutive days

Supplemental Figure 2. Associations of NSAID use with incident eGFR < 60mL/min/1.73m<sup>2</sup> and eGFR decline  $\geq 30\%$  with NSAID usage defined by at least 14 consecutive days

Supplemental Figure 3. Associations of NSAID use with incident eGFR < 60mL/min/1.73m<sup>2</sup> and eGFR decline  $\geq 30\%$  with NSAID usage defined by at least 21 consecutive days

Supplemental Figure 4. Associations of NSAID use with incident eGFR < 60mL/min/1.73m<sup>2</sup> and eGFR decline  $\geq 30\%$  in complete case analysis

Supplemental Figure 5. Associations of NSAID use with incident eGFR < 60mL/min/1.73m<sup>2</sup> and eGFR decline  $\geq 30\%$  for patients with at least 1-year follow-up

Supplemental Figure 6. Associations of NSAID use with incident eGFR < 60mL/min/1.73m<sup>2</sup> and eGFR decline  $\geq 30\%$  without weighting

Supplemental Figure 7. Associations of NSAID use with incident eGFR < 60mL/min/1.73m<sup>2</sup> and eGFR decline  $\geq 30\%$  using two consecutive eGFR values with at least 2 months in between to define outcome

Supplemental Figure 8. Associations of NSAID use with the risk of both incident eGFR < 60mL/min/1.73m<sup>2</sup> and eGFR decline  $\geq 30\%$

Supplemental Figure 9. Association between NSAIDs usage and eGFR < 60ml/min/1.73m<sup>2</sup>, eGFR decline  $\geq 30\%$  and the composite outcome within subgroups

Supplemental Table 1. Percentage of data completion of the baseline characteristics in studied patients

| Baseline Characteristic              | Number (Percentage of data completion) |
|--------------------------------------|----------------------------------------|
| Age                                  | 1,982,488 (100.0%)                     |
| Gender                               | 1,982,488 (100.0%)                     |
| Smoking status                       | 1,982,488 (100.0%)                     |
| Body mass index                      | 751,712 (37.9%)                        |
| Systolic blood pressure              | 1,062,984 (53.6%)                      |
| Diastolic blood pressure             | 1,062,926 (53.6%)                      |
| Fasting glucose                      | 1,147,314 (57.9%)                      |
| Low-density lipoprotein-cholesterol  | 1,051,612 (53.0%)                      |
| Estimated glomerular filtration rate | 1,982,488 (100.0%)                     |
| Charlson's Index                     | 1,982,488 (100.0%)                     |
| Use of anti-diabetic drugs           | 1,982,488 (100.0%)                     |
| Use of anti-hypertensive drugs       | 1,982,488 (100.0%)                     |
| Use of lipid-lowering agents         | 1,982,488 (100.0%)                     |
| Use of aspirin                       | 1,982,488 (100.0%)                     |

Supplemental Table 2. Baseline characteristics of 1,982,488 subjects aged 18 years or above with baseline eGFR  $\geq$  60ml/min/1.73m<sup>2</sup> in different drug groups before weighting

|                                 | No NSAID<br>(n=1,821,067) | NSAID<br>(n=161,421) | Celecoxib<br>(n=1,348) | Etoricoxib<br>(n=1,095) | Diclofenac<br>(n=94,035) | Ibuprofen<br>(n=15,838) | Indomethacin<br>(n=5,402) | Mefenamic acid<br>(n=11,479) | Naproxen<br>(n=30,342) | Piroxicam<br>(n=1,333) | Sulindac<br>(n=549) |
|---------------------------------|---------------------------|----------------------|------------------------|-------------------------|--------------------------|-------------------------|---------------------------|------------------------------|------------------------|------------------------|---------------------|
| Male                            | 866,144 (48%)             | 62,026 (38%)         | 493 (37%)              | 455 (42%)               | 38,607 (41%)             | 6,060 (38%)             | 3,048 (56%)               | 608 (5%)                     | 7,486 (49%)            | 2,299 (44%)            | 5,157 (48%)         |
| Age, years                      | 55 (18)                   | 57 (15)              | 62 (16)                | 58 (16)                 | 58 (15)                  | 59 (15)                 | 56 (16)                   | 42 (12)                      | 55 (16)                | 55 (16)                | 54 (17)             |
| Current smoker                  | 61,779 (3%)               | 4,835 (3%)           | 20 (1%)                | 23 (2%)                 | 2,828 (3%)               | 585 (4%)                | 192 (4%)                  | 185 (2%)                     | 452 (3%)               | 160 (3%)               | 333 (3%)            |
| Systolic BP, mmHg               | 132 (20)                  | 131 (20)             | 132 (21)               | 133 (21)                | 132 (19)                 | 131 (19)                | 133 (20)                  | 124 (19)                     | 131 (20)               | 132 (20)               | 131 (20)            |
| Diastolic BP, mmHg              | 76 (12)                   | 76 (12)              | 75 (12)                | 77 (12)                 | 76 (12)                  | 75 (12)                 | 77 (12)                   | 74 (12)                      | 76 (12)                | 76 (12)                | 76 (12)             |
| Fasting glucose, mg/dL          | 104 (30)                  | 102 (26)             | 101 (23)               | 102 (28)                | 102 (26)                 | 103 (28)                | 103 (28)                  | 96 (22)                      | 103 (28)               | 103 (28)               | 103 (29)            |
| BMI, kg/m <sup>2</sup>          | 24.4 (4.1)                | 24.9 (4.2)           | 24.0 (4.4)             | 23.8 (4.1)              | 25.0 (4.2)               | 24.9 (4.2)              | 25.4 (4.2)                | 24.0 (4.2)                   | 24.7 (4.0)             | 24.8 (4.0)             | 24.7 (4.2)          |
| LDL cholesterol, mg/dL          | 118 (36)                  | 116 (35)             | 105 (34)               | 104 (34)                | 117 (35)                 | 116 (35)                | 114 (35)                  | 112 (35)                     | 117 (35)               | 117 (35)               | 116 (36)            |
| eGFR, ml/min/1.73m <sup>2</sup> | 115 (46)                  | 114 (30)             | 113 (28)               | 115 (29)                | 113 (29)                 | 112 (31)                | 110 (30)                  | 130 (32)                     | 114 (28)               | 115 (30)               | 114 (27)            |
| Charlson comorbidity index      | 2.4 (2.0)                 | 2.7 (1.9)            | 3.4 (2.0)              | 3.1 (2.1)               | 2.8 (1.9)                | 2.9 (1.9)               | 2.6 (1.9)                 | 1.0 (1.2)                    | 2.5 (1.8)              | 2.5 (1.9)              | 2.4 (1.9)           |
| Coronary heart disease          | 88,798 (5%)               | 8,622 (5%)           | 105 (8%)               | 56 (5%)                 | 5,145 (5%)               | 929 (6%)                | 344 (6%)                  | 109 (1%)                     | 704 (5%)               | 227 (4%)               | 564 (5%)            |
| Heart failure                   | 31,580 (2%)               | 2,434 (2%)           | 27 (2%)                | 23 (2%)                 | 1,292 (1%)               | 317 (2%)                | 106 (2%)                  | 56 (0.5%)                    | 198 (1%)               | 69 (1%)                | 128 (1%)            |
| Diabetes mellitus               | 240,682 (13%)             | 20,257 (13%)         | 169 (13%)              | 139 (13%)               | 12,247 (13%)             | 2,513 (16%)             | 628 (12%)                 | 548 (5%)                     | 1,856 (12%)            | 659 (13%)              | 1,475 (14%)         |
| Atrial fibrillation             | 38,647 (2%)               | 2,938 (2%)           | 52 (4%)                | 30 (3%)                 | 1,628 (2%)               | 347 (2%)                | 110 (2%)                  | 78 (0.7%)                    | 267 (2%)               | 94 (2%)                | 137 (1%)            |
| Peripheral vascular disease     | 4,587 (0.3%)              | 585 (0.4%)           | 2 (0.1%)               | 4 (0.4%)                | 369 (0.4%)               | 62 (0.4%)               | 22 (0.4%)                 | 15 (0.1%)                    | 46 (0.3%)              | 21 (0.4%)              | 55 (0.5%)           |
| Stroke                          | 104,913 (6%)              | 7,587 (5%)           | 82 (6%)                | 74 (7%)                 | 4,322 (5%)               | 938 (6%)                | 278 (5%)                  | 222 (2%)                     | 763 (5%)               | 275 (5%)               | 539 (5%)            |
| Amputation                      | 1,829 (0.1%)              | 262 (0.2%)           | 2 (0.1%)               | 1 (0.1%)                | 179 (0.2%)               | 22 (0.1%)               | 8 (0.1%)                  | 14 (0.1%)                    | 19 (0.1%)              | 4 (0.1%)               | 15 (0.1%)           |
| Dementia                        | 15,565 (0.9%)             | 695 (0.4%)           | 11 (0.8%)              | 6 (0.5%)                | 357 (0.4%)               | 121 (0.8%)              | 16 (0.3%)                 | 10 (0.1%)                    | 82 (0.5%)              | 15 (0.3%)              | 68 (0.6%)           |
| Lung disease                    | 59,532 (3%)               | 5,520 (3%)           | 67 (5%)                | 38 (3%)                 | 3,236 (3%)               | 626 (4%)                | 183 (3%)                  | 202 (2%)                     | 488 (3%)               | 155 (3%)               | 337 (3%)            |
| Connective tissue disease       | 6,415 (0.4%)              | 2,192 (1%)           | 26 (2%)                | 14 (1%)                 | 972 (1%)                 | 199 (1%)                | 52 (1%)                   | 105 (0.9%)                   | 50 (0.3%)              | 9 (0.2%)               | 31 (0.3%)           |
| Peptic ulcer                    | 43,086 (2%)               | 3,561 (2%)           | 85 (6%)                | 37 (3%)                 | 2,092 (2%)               | 363 (2%)                | 109 (2%)                  | 103 (1%)                     | 329 (2%)               | 123 (2%)               | 253 (2%)            |
| Liver disease                   | 43,060 (2%)               | 4,462 (3%)           | 49 (4%)                | 37 (3%)                 | 2,612 (3%)               | 475 (3%)                | 145 (3%)                  | 180 (2%)                     | 351 (2%)               | 116 (2%)               | 251 (2%)            |
| Hemiplegia                      | 18,239 (1%)               | 1,114 (0.7%)         | 12 (0.9%)              | 4 (0.4%)                | 602 (0.6%)               | 173 (1%)                | 33 (0.6%)                 | 41 (0.4%)                    | 73 (0.5%)              | 31 (0.6%)              | 38 (0.4%)           |
| Leukemia                        | 2,260 (0.1%)              | 170 (0.1%)           | 3 (0.2%)               | 0 (0.0%)                | 71 (0.1%)                | 28 (0.2%)               | 6 (0.1%)                  | 11 (0.1%)                    | 26 (0.2%)              | 6 (0.1%)               | 15 (0.1%)           |
| Malignant lymphoma              | 2,725 (0.1%)              | 305 (0.2%)           | 3 (0.2%)               | 3 (0.3%)                | 159 (0.2%)               | 32 (0.2%)               | 8 (0.1%)                  | 10 (0.1%)                    | 27 (0.2%)              | 6 (0.1%)               | 18 (0.2%)           |
| Cancer                          | 94,278 (5%)               | 15,585 (10%)         | 214 (16%)              | 240 (22%)               | 9,147 (10%)              | 1,114 (7%)              | 299 (6%)                  | 344 (3%)                     | 830 (5%)               | 300 (6%)               | 864 (8%)            |
| Use of anti-diabetic drugs      | 236,348 (13%)             | 20,381 (13%)         | 178 (13%)              | 134 (12%)               | 12,279 (13%)             | 2,426 (15%)             | 685 (13%)                 | 531 (5%)                     | 1,858 (12%)            | 639 (12%)              | 1,536 (14%)         |
| Use of lipid-lowering agents    | 195,247 (11%)             | 21,732 (13%)         | 331 (25%)              | 258 (24%)               | 13,194 (14%)             | 2,462 (16%)             | 638 (12%)                 | 457 (4%)                     | 1,634 (11%)            | 555 (11%)              | 1,491 (14%)         |
| Use of anti-hypertensive drugs  | 656,493 (36%)             | 62,696 (39%)         | 583 (43%)              | 412 (38%)               | 36,864 (39%)             | 7,111 (45%)             | 2,285 (42%)               | 2,134 (19%)                  | 5,455 (36%)            | 1,838 (35%)            | 4,421 (41%)         |
| Use of aspirin                  | 198,914 (11%)             | 18,525 (11%)         | 221 (16%)              | 134 (12%)               | 10,897 (12%)             | 1,968 (12%)             | 660 (12%)                 | 347 (3%)                     | 1,617 (11%)            | 526 (10%)              | 1,220 (11%)         |

All parameters are expressed in either number (percentage) or mean (SD)

NSAID = non-steroidal anti-inflammatory drug; BP = blood pressure; BMI = body mass index; LDL cholesterol = low-density lipoprotein-cholesterol; eGFR = estimated glomerular filtration rate.

Supplemental Table 3. Follow-up period by NSAID treatment groups

|                | eGFR < 60 ml/min/1.73 m <sup>2</sup>            |
|----------------|-------------------------------------------------|
|                | Median of follow-up (interquartile range), year |
| No NSAIDs      | 6.3 (3.3,9.4)                                   |
| Any NSAIDs     | 7.0 (4.0,9.6)                                   |
| Celecoxib      | 7.5 (4.2,10.2)                                  |
| Etoricoxib     | 7.1 (3.5,10.0)                                  |
| Diclofenac     | 7.3 (4.2,9.8)                                   |
| Ibuprofen      | 7.5 (4.6,10.0)                                  |
| Indomethacin   | 8.5 (5.1,10.4)                                  |
| Mefenamic acid | 7.6 (4.7,10.0)                                  |
| Naproxen       | 7.7 (4.4,10.0)                                  |
| Piroxicam      | 10.3 (8.0,10.8)                                 |
| Sulindac       | 8.0 (3.5,10.5)                                  |

NSAID = non-steroidal anti-inflammatory drug.

Supplemental Figure 1. Associations of NSAID use with incident eGFR<60mL/min/1.73m<sup>2</sup> and eGFR decline≥30% with NSAID usage defined by at least 7 consecutive days

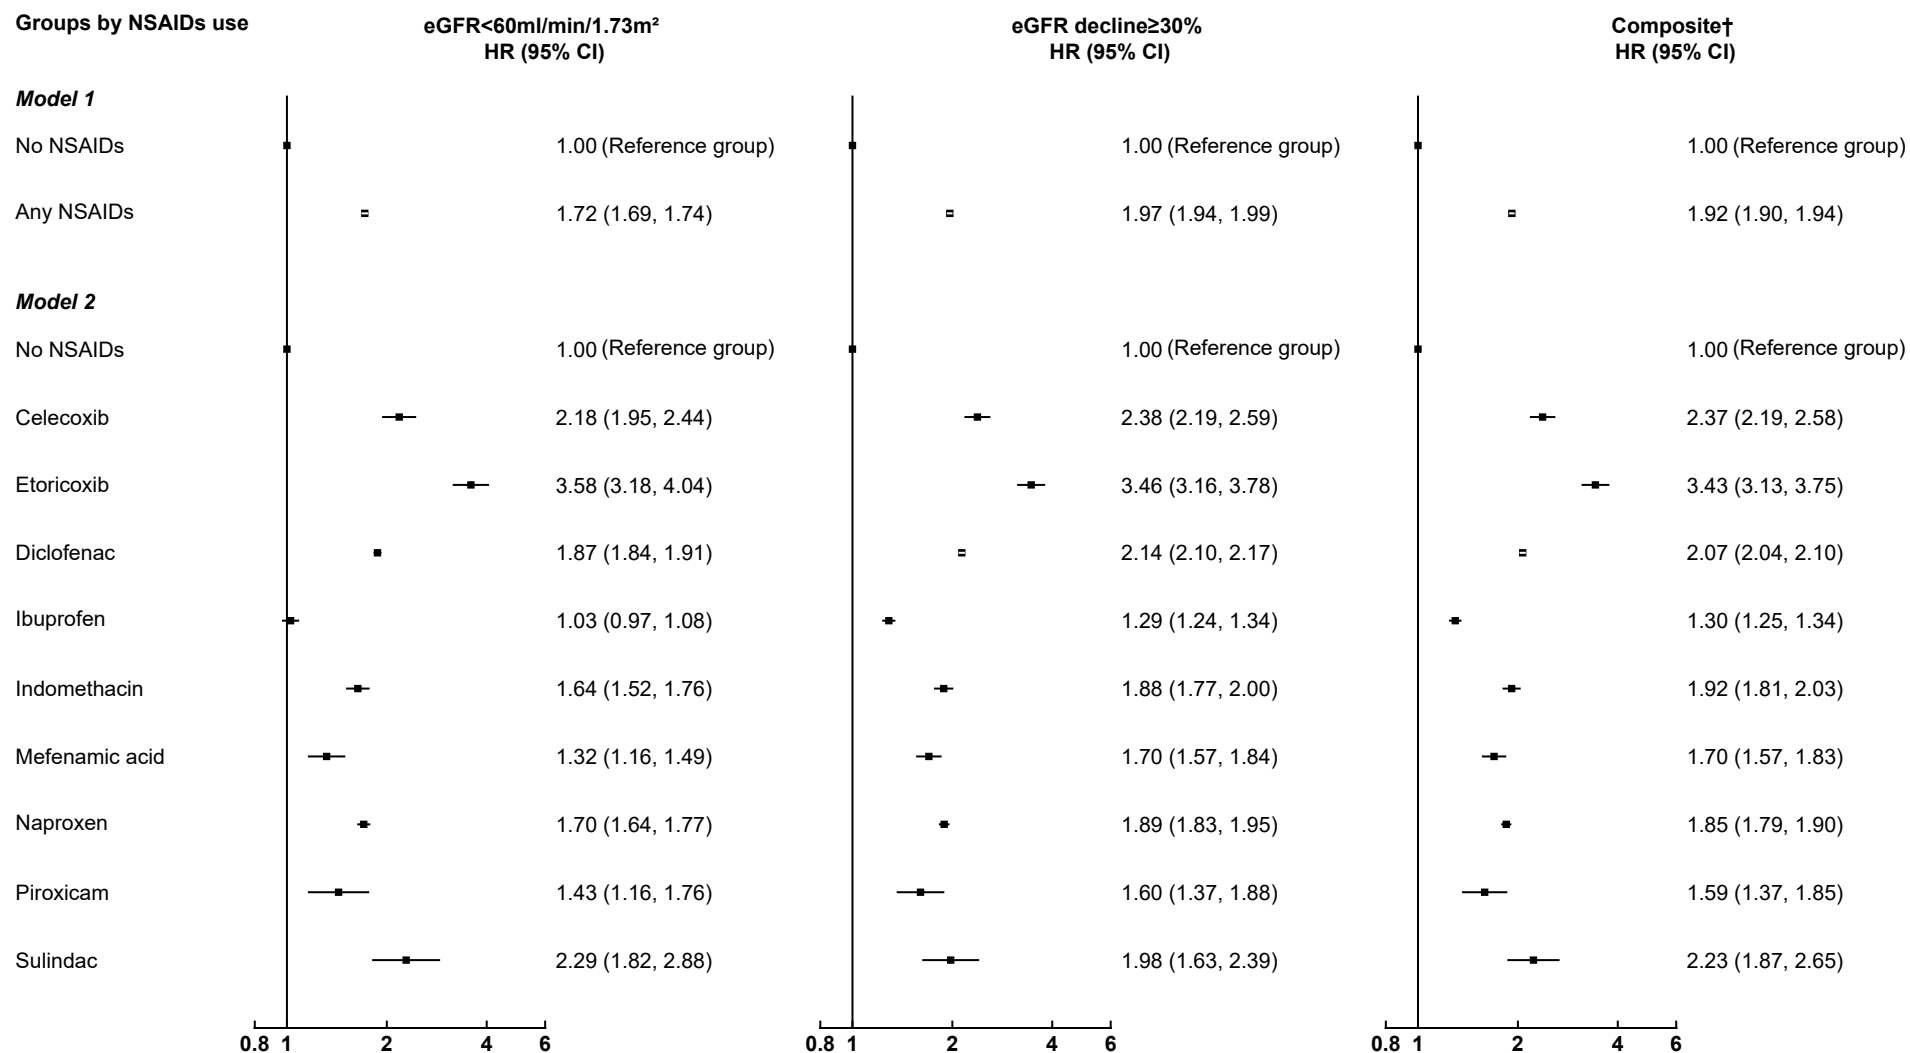

Hazard ratio was adjusted by age, gender, smoking status, body mass index, systolic blood pressure, diastolic blood pressure, fasting glucose, low-density lipoprotein-cholesterol, estimated glomerular filtration rate, the usages of anti-hypertensive drugs, anti-diabetic drugs, lipid-lowering agents, and aspirin, and all the comorbidities listed in Table 1 at baseline. NSAID = non-steroidal anti-inflammatory drug; HR = hazard ratio; CI = confidence interval.

† Composite is defined by either incident eGFR<60ml/min/1.73m<sup>2</sup> or eGFR decline≥30%.

Supplemental Figure 2. Associations of NSAID use with incident eGFR<60mL/min/1.73m<sup>2</sup> and eGFR decline≥30% with NSAID usage defined by at least 14 consecutive days

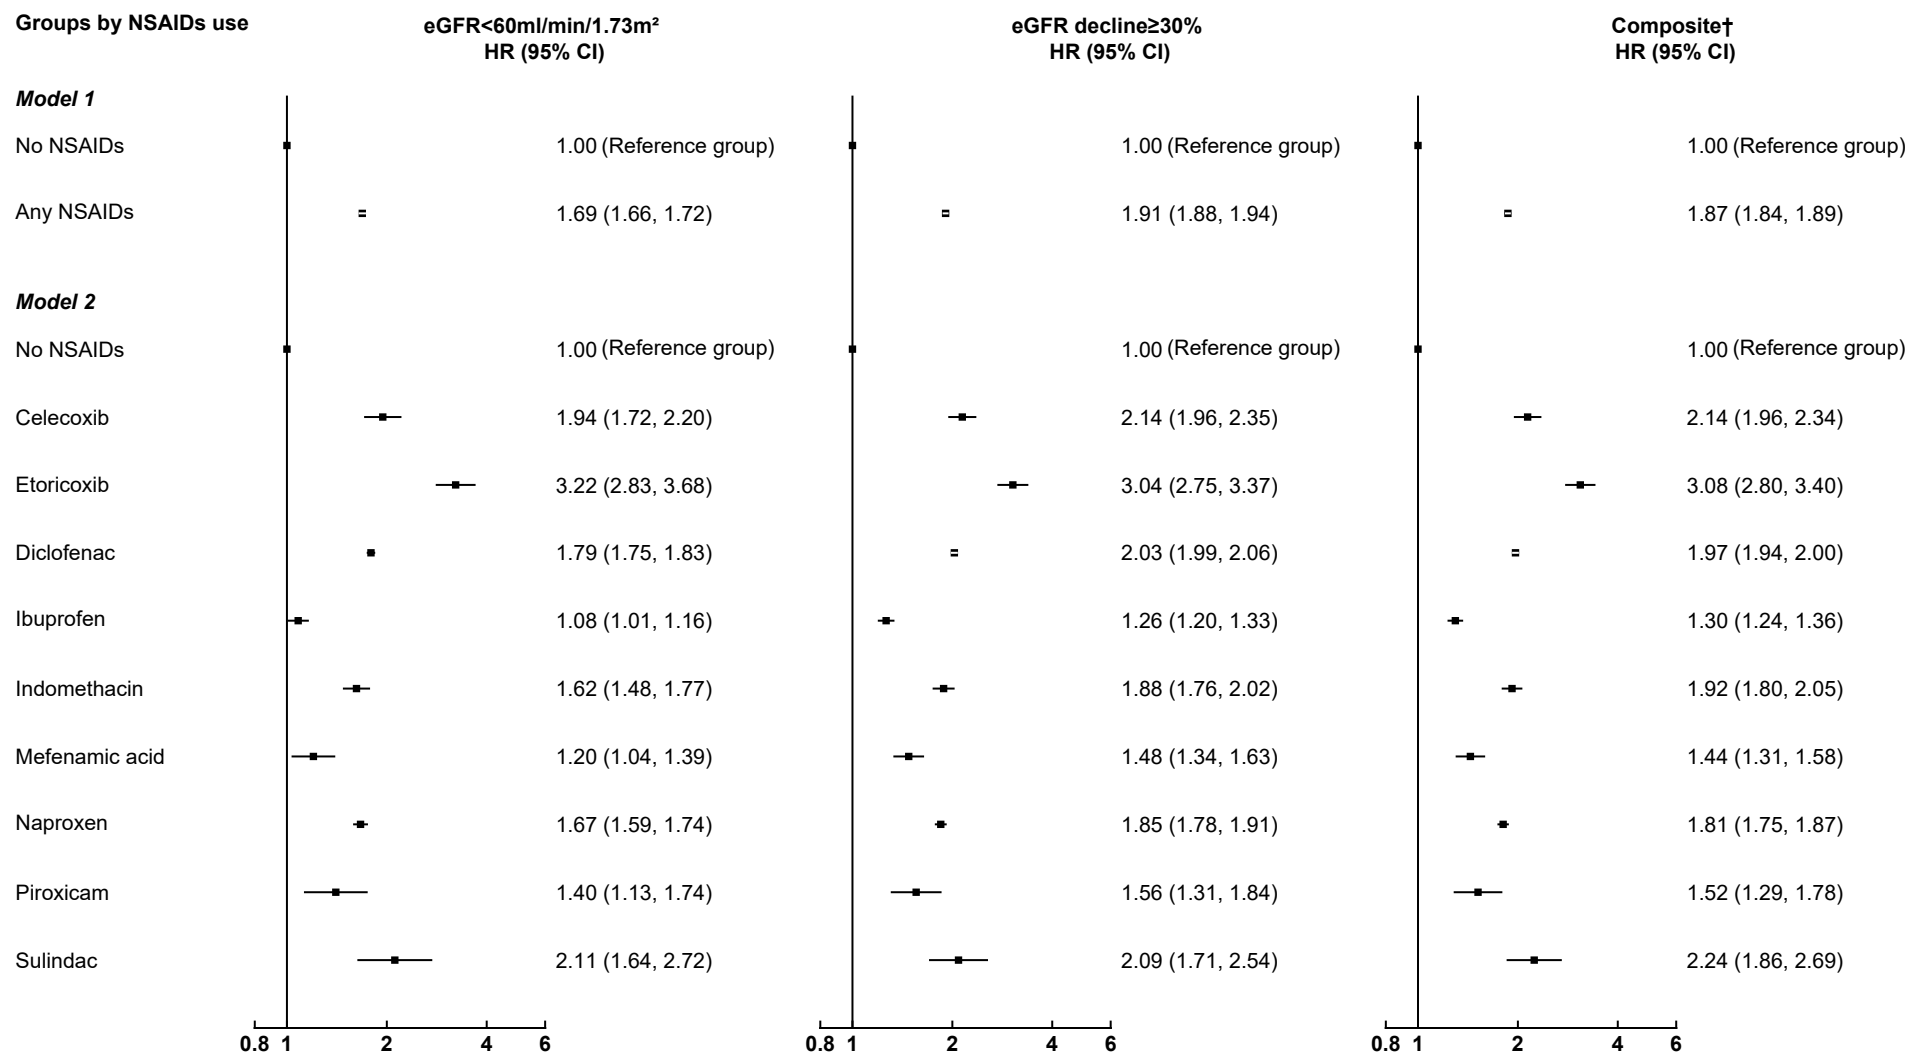

Hazard ratio was adjusted by age, gender, smoking status, body mass index, systolic blood pressure, diastolic blood pressure, fasting glucose, low-density lipoprotein-cholesterol, estimated glomerular filtration rate, the usages of anti-hypertensive drugs, anti-diabetic drugs, lipid-lowering agents, and aspirin, and all the comorbidities listed in Table 1 at baseline. NSAID = non-steroidal anti-inflammatory drug; HR = hazard ratio; CI = confidence interval.

† Composite is defined by either incident eGFR<60ml/min/1.73m<sup>2</sup> or eGFR decline≥30%.

Supplemental Figure 3. Associations of NSAID use with incident eGFR<60mL/min/1.73m<sup>2</sup> and eGFR decline≥30% with NSAID usage defined by at least 21 consecutive days

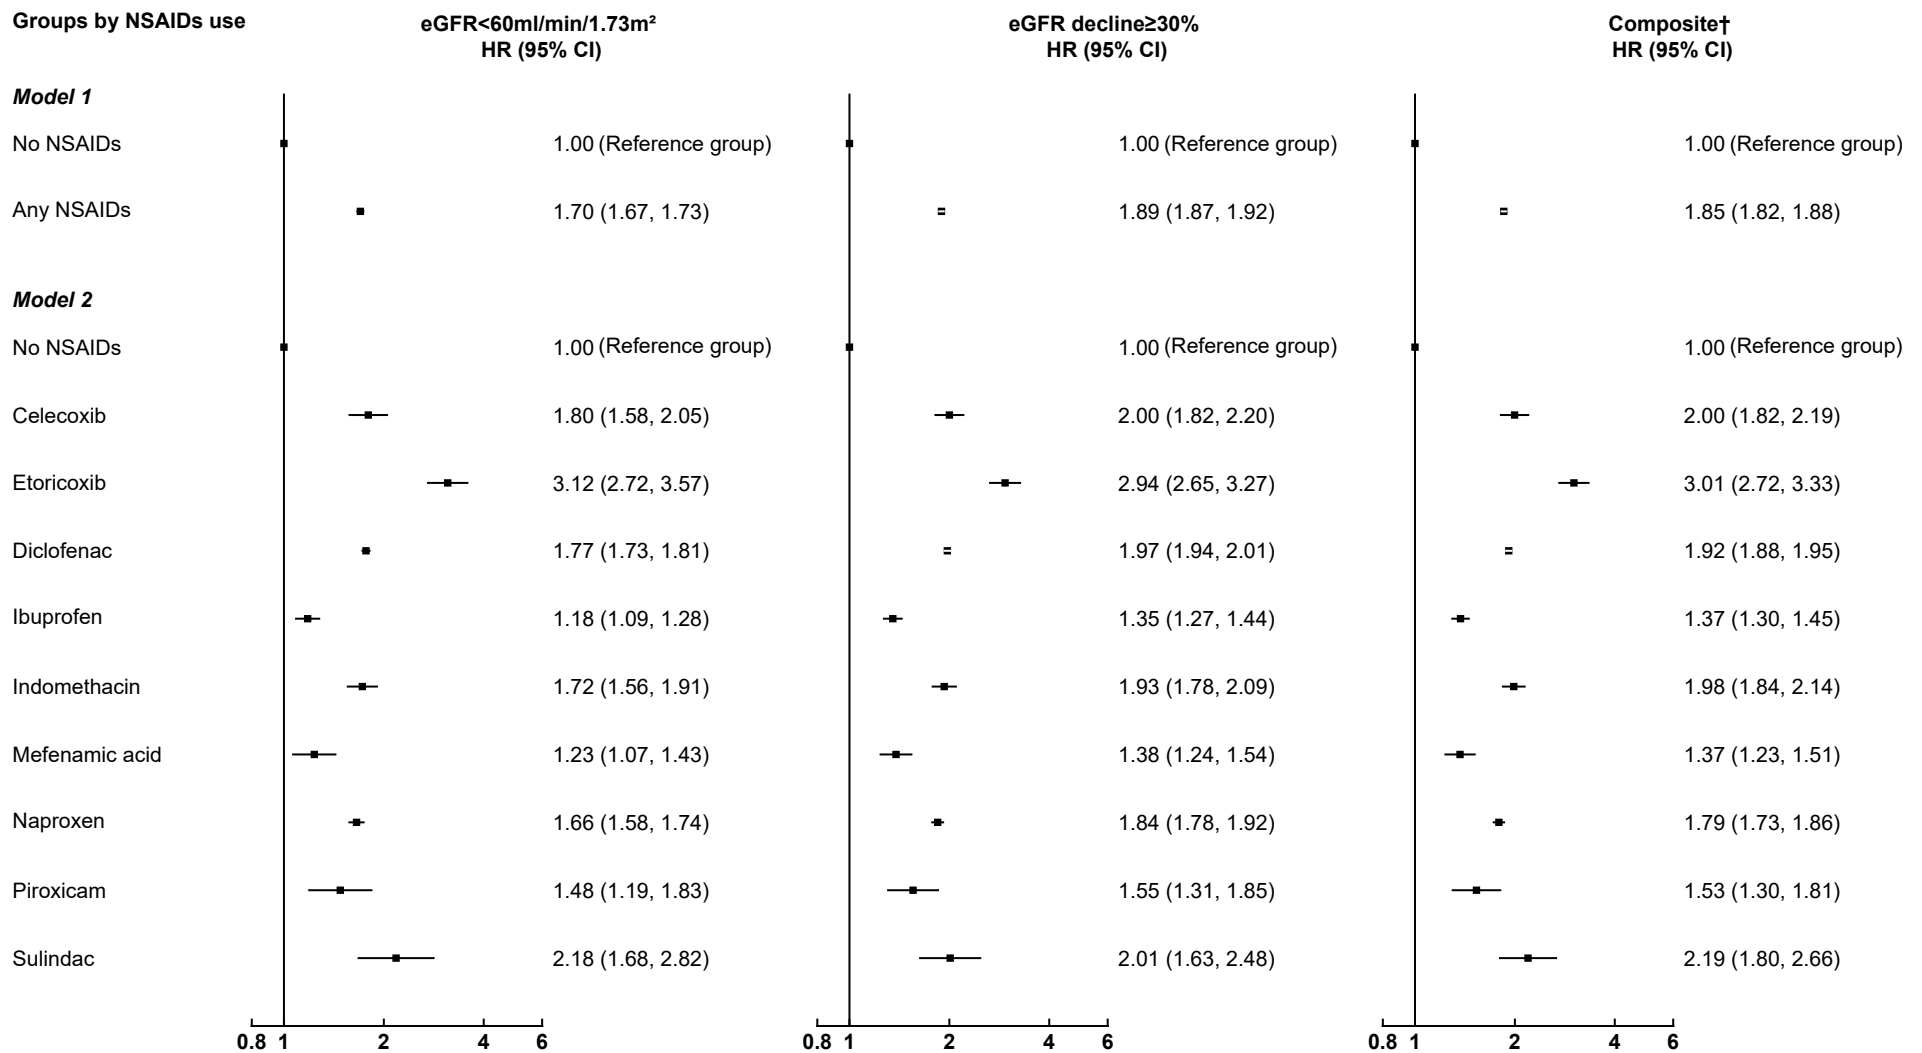

Hazard ratio was adjusted by age, gender, smoking status, body mass index, systolic blood pressure, diastolic blood pressure, fasting glucose, low-density lipoprotein-cholesterol, estimated glomerular filtration rate, the usages of anti-hypertensive drugs, anti-diabetic drugs, lipid-lowering agents, and aspirin, and all the comorbidities listed in Table 1 at baseline. NSAID = non-steroidal anti-inflammatory drug; HR = hazard ratio; CI = confidence interval.

† Composite is defined by either incident eGFR<60ml/min/1.73m<sup>2</sup> or eGFR decline≥30%.

Supplemental Figure 4. Associations of NSAID use with incident eGFR<60mL/min/1.73m<sup>2</sup> and eGFR decline≥30% in complete case analysis

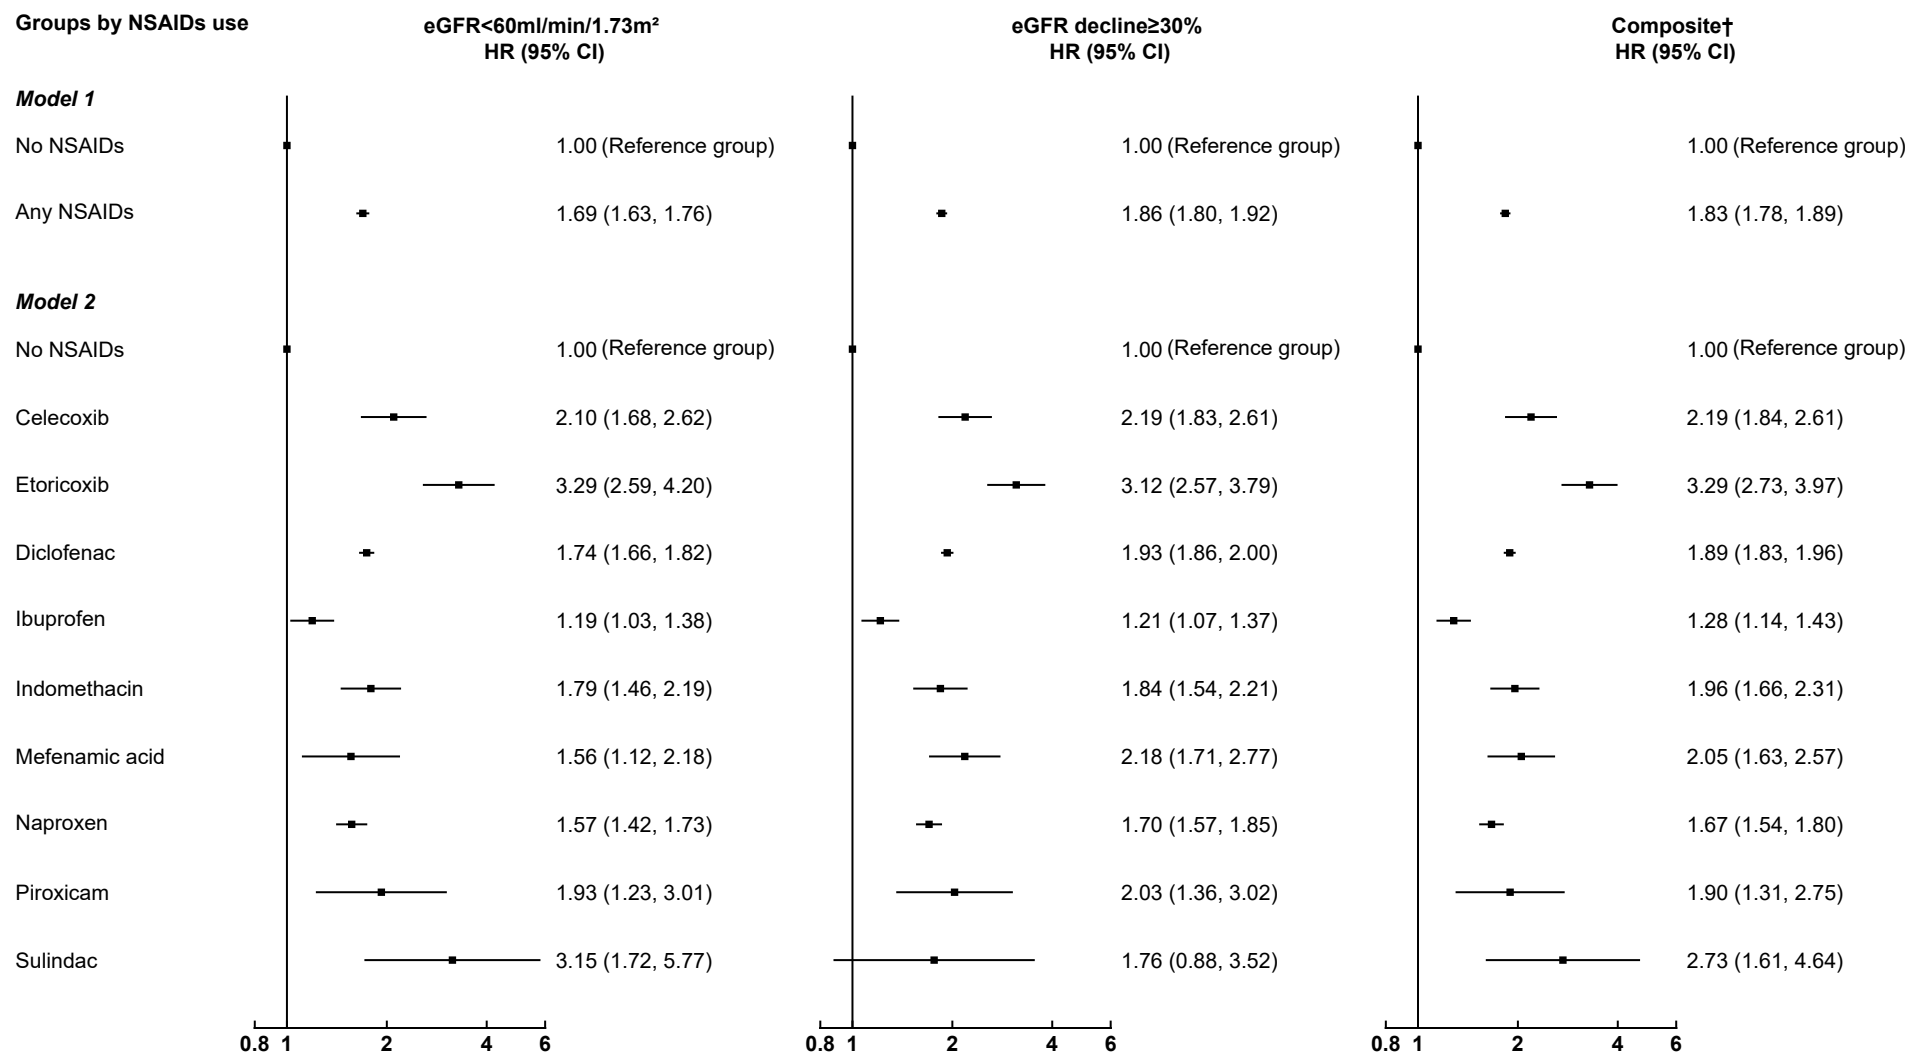

Hazard ratio was adjusted by age, gender, smoking status, body mass index, systolic blood pressure, diastolic blood pressure, fasting glucose, low-density lipoprotein-cholesterol, estimated glomerular filtration rate, the usages of anti-hypertensive drugs, anti-diabetic drugs, lipid-lowering agents, and aspirin, and all the comorbidities listed in Table 1 at baseline. NSAID = non-steroidal anti-inflammatory drug; HR = hazard ratio; CI = confidence interval.

† Composite is defined by either incident eGFR<60ml/min/1.73m<sup>2</sup> or eGFR decline≥30%.



Supplemental Figure 5. Associations of NSAID use with incident eGFR<60mL/min/1.73m<sup>2</sup> and eGFR decline≥30% for patients with at least 1-year follow-up

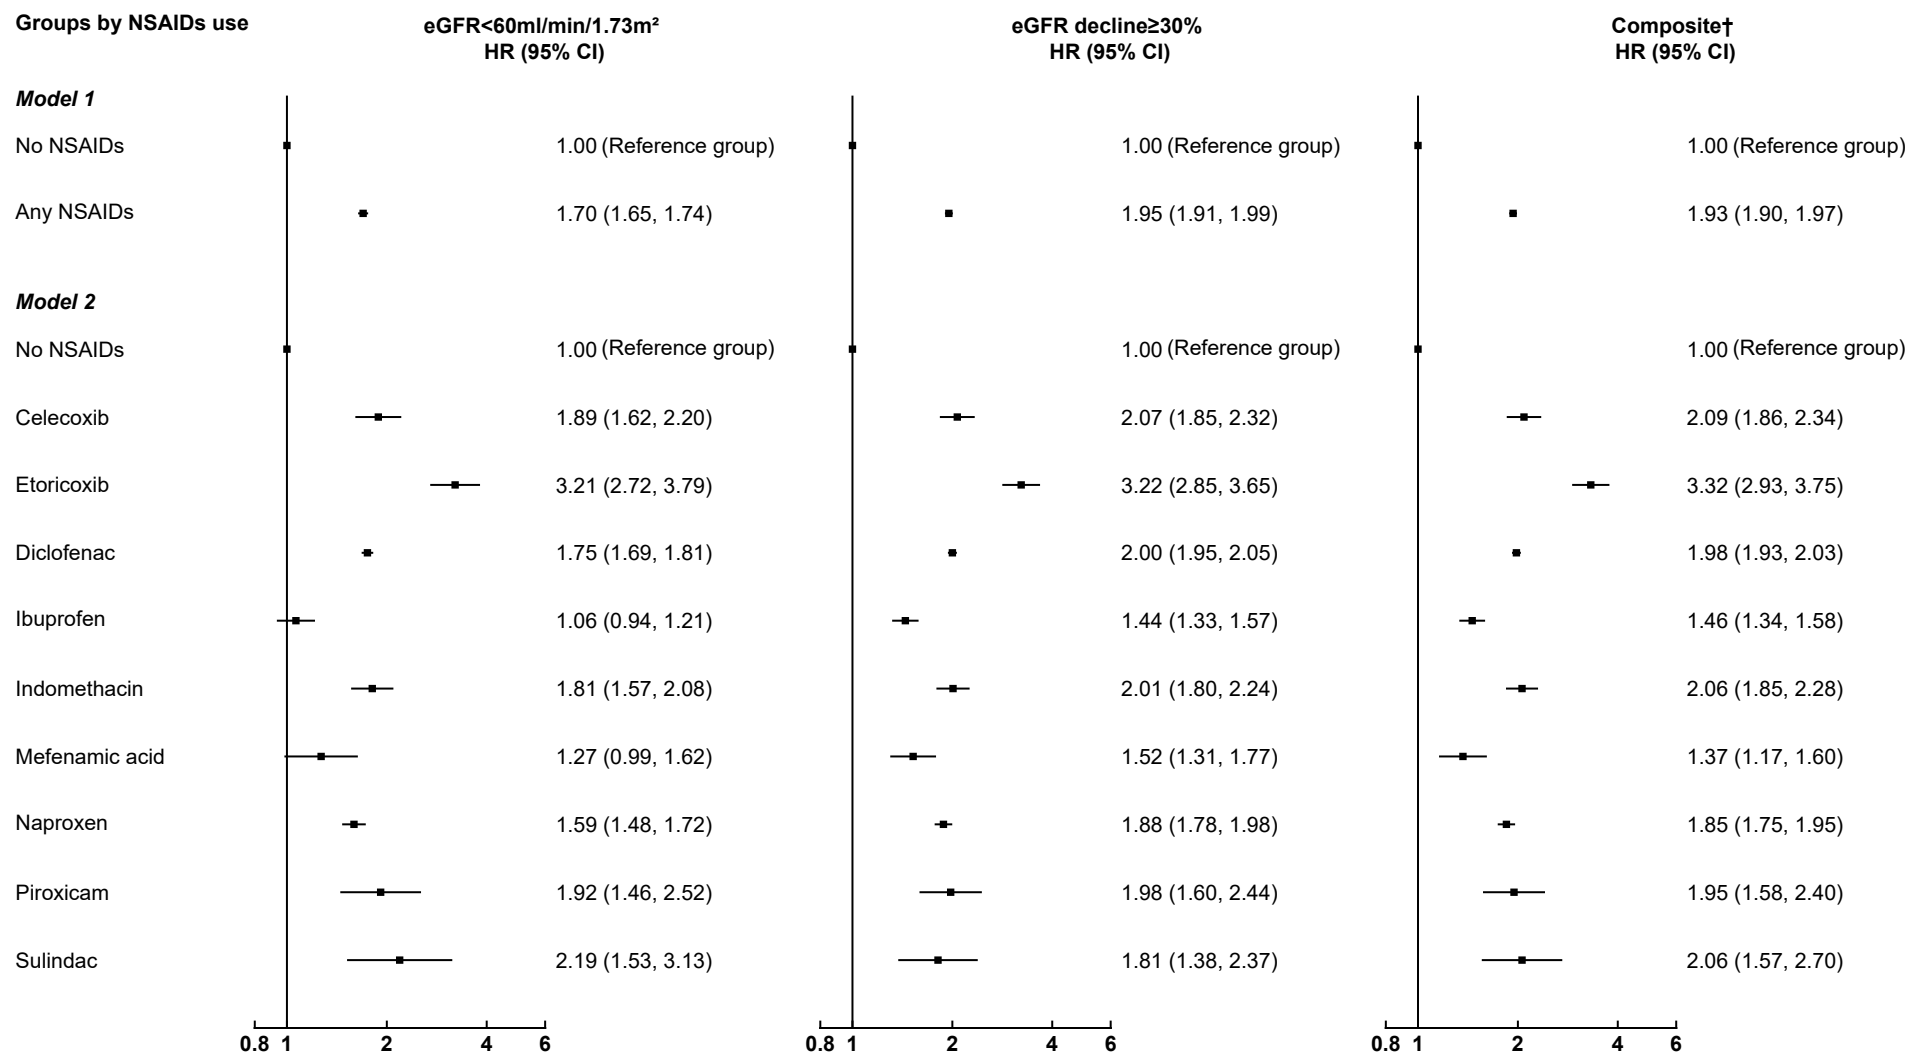

Hazard ratio was adjusted by age, gender, smoking status, body mass index, systolic blood pressure, diastolic blood pressure, fasting glucose, low-density lipoprotein-cholesterol, estimated glomerular filtration rate, the usages of anti-hypertensive drugs, anti-diabetic drugs, lipid-lowering agents, and aspirin, and all the comorbidities listed in Table 1 at baseline. NSAID = non-steroidal anti-inflammatory drug; HR = hazard ratio; CI = confidence interval.

† Composite is defined by either incident eGFR<60ml/min/1.73m<sup>2</sup> or eGFR decline≥30%.

Supplemental Figure 6. Associations of NSAID use with incident eGFR<60mL/min/1.73m<sup>2</sup> and eGFR decline≥30% without weighting

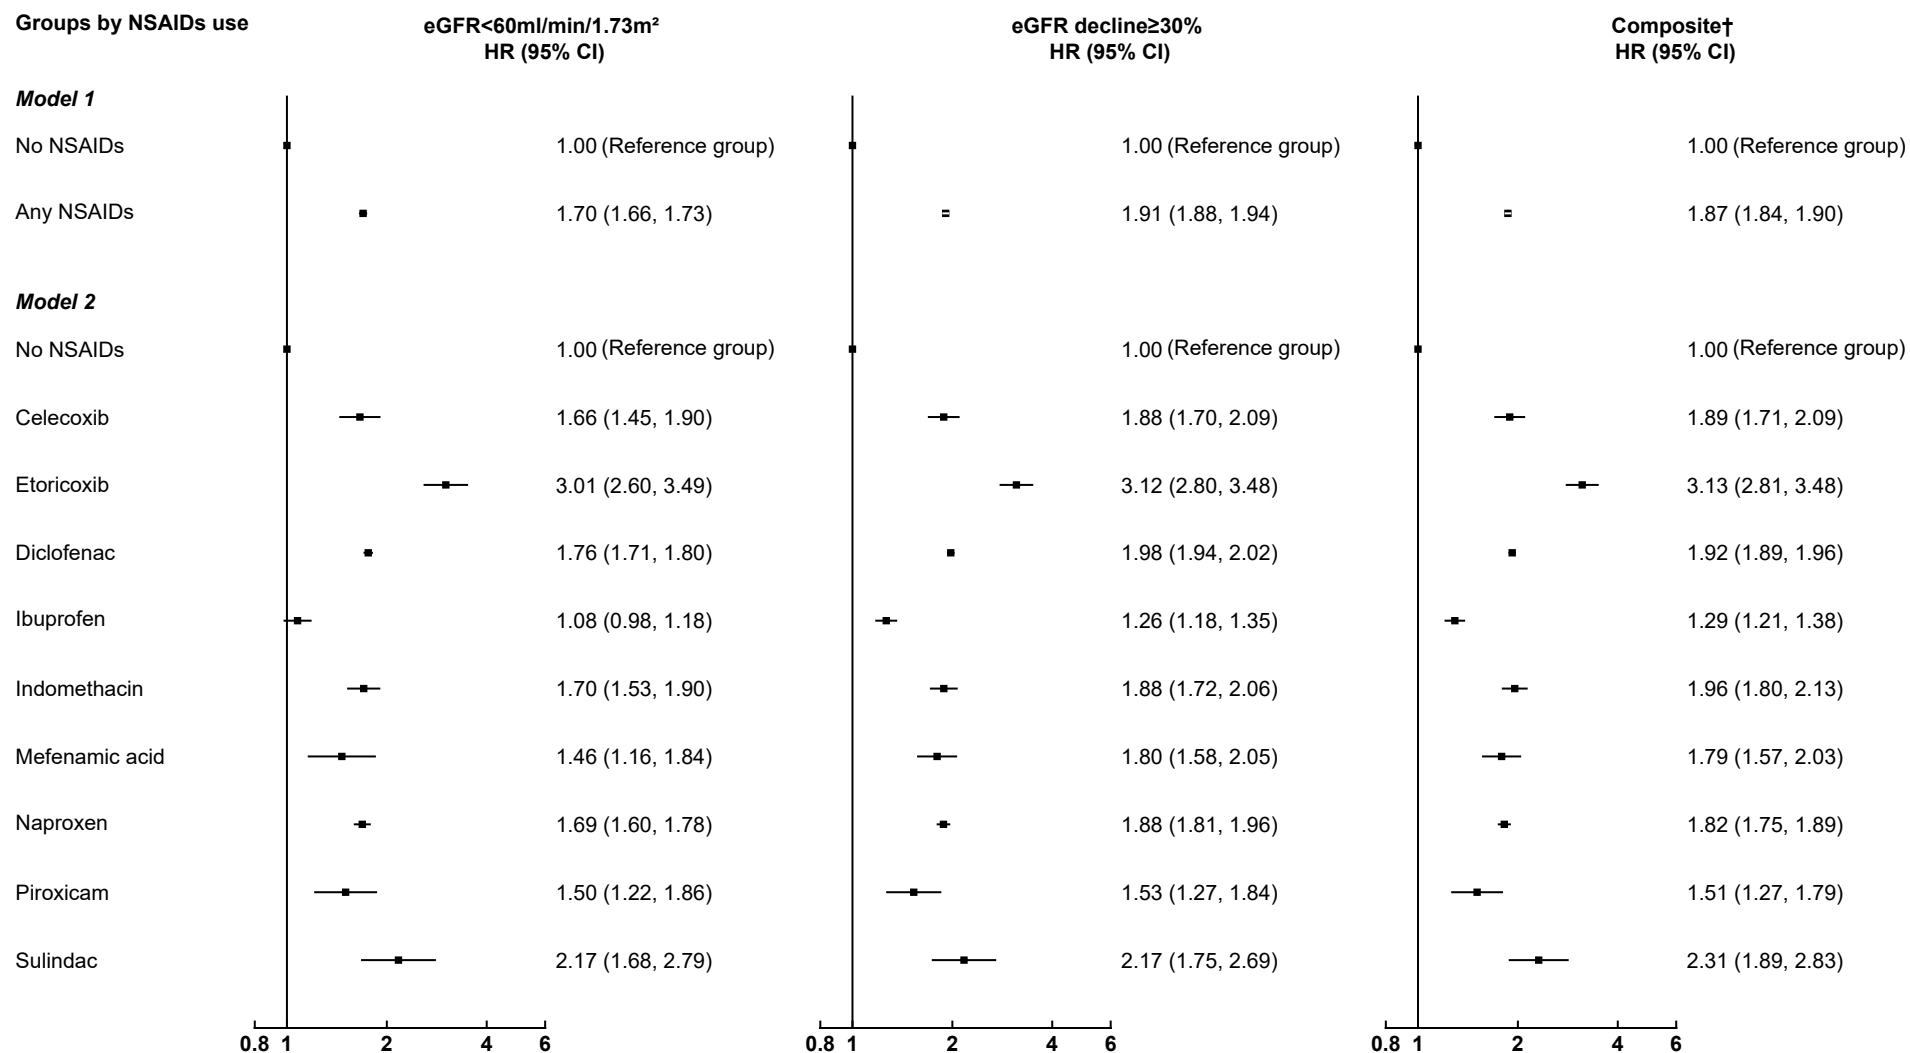

Hazard ratio was adjusted by age, gender, smoking status, body mass index, systolic blood pressure, diastolic blood pressure, fasting glucose, low-density lipoprotein-cholesterol, estimated glomerular filtration rate, the usages of anti-hypertensive drugs, anti-diabetic drugs, lipid-lowering agents, and aspirin, and all the comorbidities listed in Table 1 at baseline. NSAID = non-steroidal anti-inflammatory drug; HR = hazard ratio; CI = confidence interval.

† Composite is defined by either incident eGFR<60ml/min/1.73m<sup>2</sup> or eGFR decline≥30%.

Supplemental Figure 7. Associations of NSAID use with incident eGFR<60mL/min/1.73m<sup>2</sup> and eGFR decline≥30% using two consecutive eGFR values with at least 2 months in between to define outcome

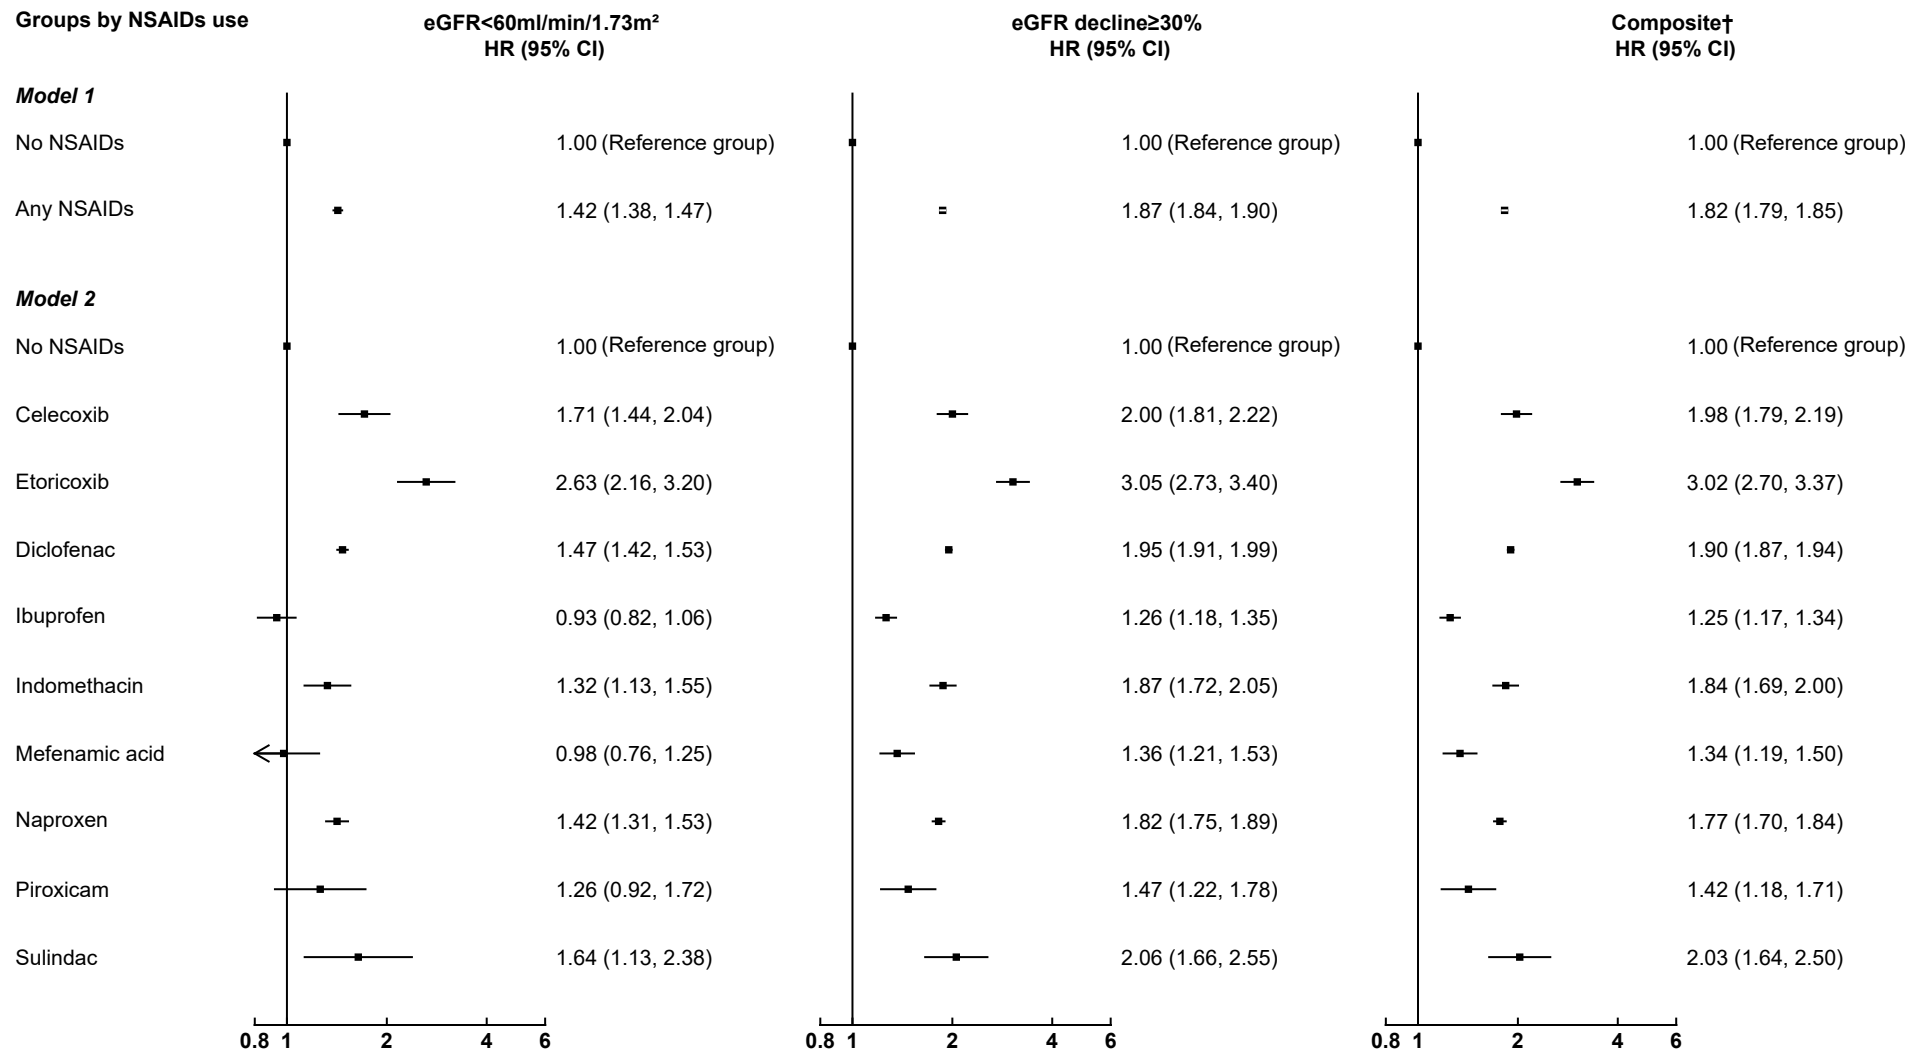

Hazard ratio was adjusted by age, gender, smoking status, body mass index, systolic blood pressure, diastolic blood pressure, fasting glucose, low-density lipoprotein-cholesterol, estimated glomerular filtration rate, the usages of anti-hypertensive drugs, anti-diabetic drugs, lipid-lowering agents, and aspirin, and all the comorbidities listed in Table 1 at baseline. NSAID = non-steroidal anti-inflammatory drug; HR = hazard ratio; CI = confidence interval.

† Composite is defined by either incident eGFR<60ml/min/1.73m<sup>2</sup> or eGFR decline≥30%.

Supplemental Figure 8. Associations of NSAID use with the risk of both incident eGFR<60mL/min/1.73m<sup>2</sup> and eGFR decline≥30%

Groups by NSAIDs use

eGFR<60ml/min/1.73m<sup>2</sup> and eGFR decline≥30%  
HR (95% CI)

**Model 1**

|            |                        |
|------------|------------------------|
| No NSAIDs  | 1.00 (Reference group) |
| Any NSAIDs | 1.77 (1.72, 1.83)      |

**Model 2**

|                |                        |
|----------------|------------------------|
| No NSAIDs      | 1.00 (Reference group) |
| Celecoxib      | 1.71 (1.41, 2.07)      |
| Etoricoxib     | 3.29 (2.71, 3.99)      |
| Diclofenac     | 1.87 (1.81, 1.94)      |
| Ibuprofen      | 1.10 (0.97, 1.25)      |
| Indomethacin   | 1.56 (1.33, 1.83)      |
| Mefenamic acid | 1.33 (1.08, 1.64)      |
| Naproxen       | 1.77 (1.65, 1.90)      |
| Piroxicam      | 1.40 (1.01, 1.93)      |
| Sulindac       | 1.34 (0.88, 2.03)      |

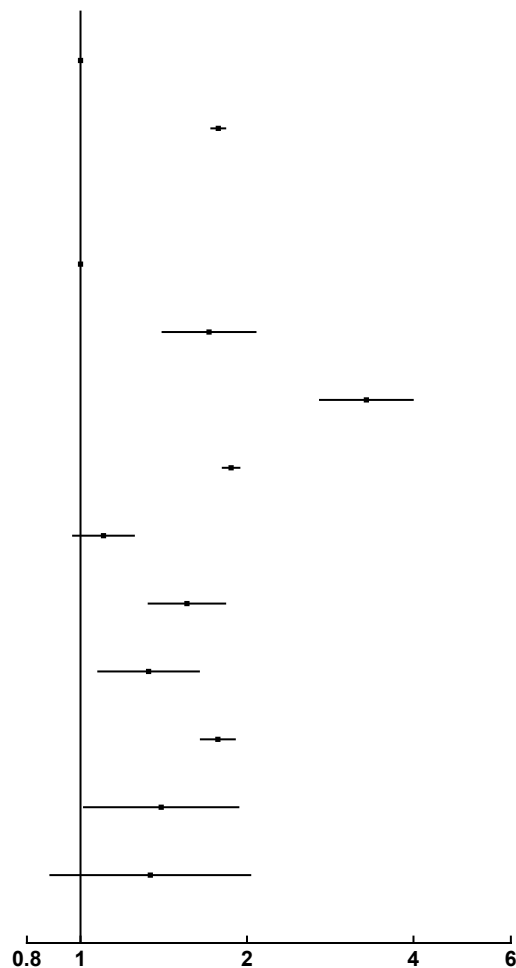

Hazard ratio was adjusted by age, gender, smoking status, body mass index, systolic blood pressure, diastolic blood pressure, fasting glucose, low-density lipoprotein-cholesterol, estimated glomerular filtration rate, the usages of anti-hypertensive drugs, anti-diabetic drugs, lipid-lowering agents, and aspirin, and all the comorbidities listed in Table 1 at baseline. NSAID = non-steroidal anti-inflammatory drug; HR = hazard ratio; CI = confidence interval.

Supplemental Figure 9. Association between NSAIDs usage and eGFR<60ml/min/1.73m<sup>2</sup>, eGFR decline≥30% and the composite outcome within subgroups

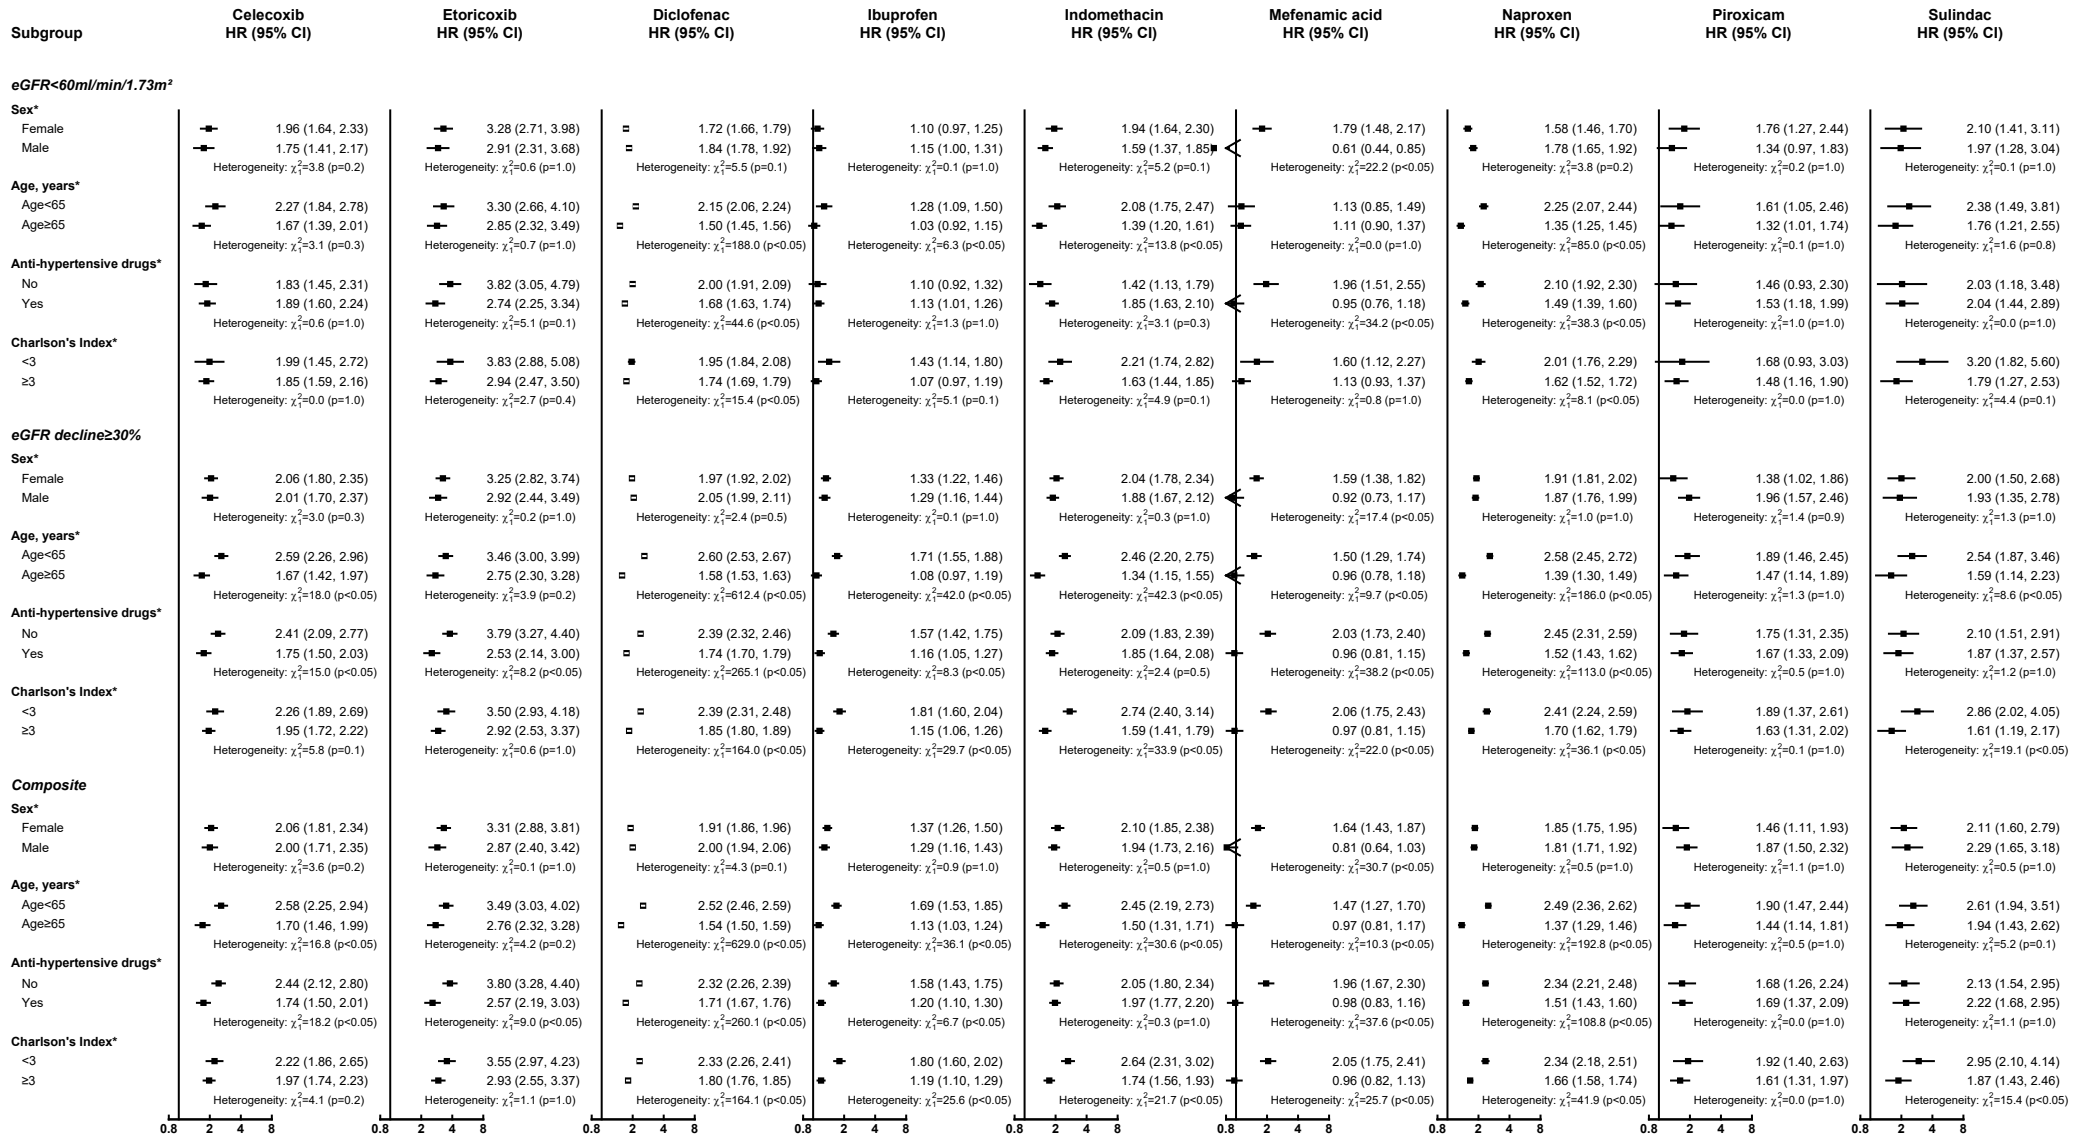

Hazard ratio was adjusted by age, gender, smoking status, body mass index, systolic blood pressure, diastolic blood pressure, fasting glucose, low-density lipoprotein-cholesterol, estimated glomerular filtration rate, the usages of anti-hypertensive drugs, anti-diabetic drugs, lipid-lowering agents, and aspirin, and all the comorbidities listed in Table 1 at baseline. NSAID = non-steroidal anti-inflammatory drug; HR = hazard ratio; CI = confidence interval.

\* Significant interaction between NSAID treatment group and studied subgroup (P-value<0.05) by Wald test.
